# Supplementary material for: Elemental analysis of copper and magnesium alloy samples using IR-laser ablation in comparison with spark and glow discharge methods
Source: Royal Society of Chemistry journal article supplement (doi:10.1039/b903251g), 2009-01-01
Supplement: b903251g.pdf [file b903251g.pdf]

## Electronic Supplementary Information for “Comparative elemental analysis of copper and magnesium alloy samples using IR - laser ablation, spark and glow discharge methods”

**Table SI-1** Spectral lines (nm) used with LS-ICP-OES and spark-OES

| Element | LS – ICP-OES                       | Spark-OES                               |
|---------|------------------------------------|-----------------------------------------|
| Al      | 237.8                              | 394.4 <sup>1</sup> ; 308.2 <sup>h</sup> |
| Ca      | 318.1                              | 422.6                                   |
| Ce      | 322.1                              | 413.7                                   |
| Cu      | 224.7                              | 324.7                                   |
| La      | 231.9                              | 408.67                                  |
| Mn      | 263.2                              | 403.3                                   |
| Ni      | 221.6 ; 232.1 ; 300.2 <sup>a</sup> | 352.4                                   |
| Si      | 212.4                              | 251.6                                   |
| Zn      | 307.5                              | 481.0                                   |
| Zr      | 313.8                              | 343.8                                   |

<sup>a</sup> All of the three noted lines were useless for calibration, <sup>1</sup> low range of mass fraction: < 1 mg kg<sup>-1</sup>; <sup>h</sup> higher range of mass fraction > 1 mg kg<sup>-1</sup>

**Table SI-2** Ranges of analyte contents in the estimated samples and isotopes measured

| copper <sup>a</sup> (mg kg <sup>-1</sup> ) |           | Magnesium alloys (% mass) |              |
|--------------------------------------------|-----------|---------------------------|--------------|
| Ag ( <sup>107</sup> Ag)                    | 1.8-47.4  | Al                        | 0.001-10.38  |
| As ( <sup>75</sup> As)                     | 0.78-24.2 | Ca                        | 0.009-0.154  |
| Bi ( <sup>209</sup> Bi)                    | 0.53-9.6  | Ce                        | 1.64-2.64    |
| Cd ( <sup>111/114</sup> Cd) <sup>b</sup>   | 0.9-7.8   | Cu                        | 0.004-0.131  |
| Co ( <sup>59</sup> Co)                     | 0.73-5.2  | Mn                        | 0.012-1.69   |
| Cr ( <sup>53/52</sup> Cr) <sup>c</sup>     | 0.2-9.81  | Ni                        | 0.0005-0.015 |
| Mg ( <sup>24</sup> Mg)                     | 1.4-29.1  | La                        | 0.52-0.77    |
| Mn ( <sup>55</sup> Mn)                     | 0.22-10.1 | Si                        | 0.001-0.37   |
| Ni ( <sup>60</sup> Ni)                     | 0.7-25    | Zn                        | 0.001-2.87   |
| Pb ( <sup>208</sup> Pb)                    | 0.59-23.4 | Zr                        | 0.14-0.65    |
| Sb ( <sup>121</sup> Sb)                    | 0.58-31.2 |                           |              |
| Te ( <sup>128/130</sup> Te) <sup>d</sup>   | 0.21-38.3 |                           |              |

<sup>a</sup> These are the ranges defined by all samples. Ranges measured may differ, due to the fact that not all samples are measured by the two methods; <sup>b,c,d</sup> alternative isotopes measured by GD-MS

**Table SI-3** Maximum relative standard deviations<sup>a</sup>. RSDs (%) and coefficients of determination  $R^2$  from measurements of analytes in copper powder samples with LS-ICP-MS and GD-MS

|                 | <sup>107</sup> Ag | <sup>27</sup> Al | <sup>75</sup> As | <sup>209</sup> Bi | <sup>111</sup> Cd <sup>b</sup> | <sup>59</sup> Co | <sup>53</sup> Cr | <sup>165</sup> Ho | <sup>24</sup> Mg | <sup>55</sup> Mn | <sup>60</sup> Ni | <sup>208</sup> Pb | <sup>45</sup> Sc | <sup>128</sup> Te <sup>c</sup> | <sup>169</sup> Tm |
|-----------------|-------------------|------------------|------------------|-------------------|--------------------------------|------------------|------------------|-------------------|------------------|------------------|------------------|-------------------|------------------|--------------------------------|-------------------|
| RSD LS-ICP-MS   | 9.7               | 12.6             | 5.4              | 6.1               | 7.4                            | 5.9              | 7.8              | 17.5              | - <sup>d</sup>   | 9.4              | 9.6              | 7.4               | 13.5             | 4.9                            | 15                |
| GD-MS           | 7.4               | 6.4              | 8.2              | 7                 | 19.2                           | 5.7              | 9.6              | 11                | 5.8              | 8.1              | 8.8              | 7.6               | 14               | 18                             | 15                |
| $R^2$ LS-ICP-MS | 0.998             | 0.94             | 0.999            | 0.999             | 0.999                          | 0.998            | 0.998            | 0.997             | - <sup>d</sup>   | 0.999            | 0.999            | 0.996             | 0.999            | 0.999                          | 0.991             |
| GD-MS           | 0.999             | 0.997            | 0.999            | 0.997             | 0.999                          | 0.999            | 0.999            | 0.999             | 0.999            | 0.999            | 0.999            | 0.987             | 0.999            | 0.979                          | 0.999             |

<sup>a</sup> for details see text; <sup>b</sup> <sup>114</sup>Cd for GD-MS measurements; <sup>c</sup> measurement in medium resolution for GD-MS; <sup>d</sup> data unsuitable for calibration

**Table SI-4** Maximum relative standard deviations<sup>a</sup>. RSDs (%) and coefficients of determination  $R^2$  from measurements of analytes in copper samples with LS-ICP-MS and GD-MS

|                    | <sup>107</sup> Ag | <sup>75</sup> As | <sup>209</sup> Bi | <sup>111</sup> Cd <sup>b</sup> | <sup>59</sup> Co | <sup>53</sup> Cr <sup>c</sup> | <sup>24</sup> Mg | <sup>55</sup> Mn | <sup>60</sup> Ni | <sup>208</sup> Pb | <sup>121</sup> Sb | <sup>128</sup> Te <sup>d</sup> |
|--------------------|-------------------|------------------|-------------------|--------------------------------|------------------|-------------------------------|------------------|------------------|------------------|-------------------|-------------------|--------------------------------|
| RSD LS-ICP-MS      | 9.2               | 1.8              | 1.9               | 1.4                            | 1.1              | 6.7                           | - <sup>e</sup>   | 3.5              | 3.7              | 3.9               | 3.1               | 4.8                            |
| GD-MS <sup>a</sup> | 7.2               | 5.3              | 8.7               | 7.3                            | 8.4              | 14.4                          | 8.8              | 9.9              | 16.2             | 17.3              | 7.3               | 5.9                            |
| $R^2$ LS-ICP-MS    | 0.895             | 0.998            | 0.993             | 0.999                          | 0.992            | 0.999                         | - <sup>e</sup>   | 0.999            | 0.978            | 0.988             | 0.997             | 0.997                          |
| GD-MS <sup>a</sup> | 0.999             | 0.998            | 0.999             | 0.998                          | 0.998            | 0.997                         | 0.999            | 0.998            | 0.999            | 0.999             | 0.999             | 0.999                          |

<sup>a</sup> for details see text; <sup>b</sup> measurements in medium resolution; <sup>c</sup> <sup>52</sup>Cr in case of GD-MS; <sup>d</sup> <sup>130</sup>Te in case of GD-MS; <sup>e</sup> data unsuitable for calibration.

**Table SI-5** Maximum relative standard deviations<sup>a</sup>, RSDs (%) and coefficients of determination  $R^2$  from measurements of analytes in magnesium alloy samples with LS-ICP-OES and spark -OES

|       |            | Al    | Ca    | Ce    | Cu    | La    | Mn    | Ni             | Si    | Zn    | Zr    |
|-------|------------|-------|-------|-------|-------|-------|-------|----------------|-------|-------|-------|
| RSD   | LS-ICP-OES | 3.1   | 5.5   | 2.1   | 28    | 1.9   | 3.9   | - <sup>b</sup> | 5.2   | 4.8   | 1.5   |
|       | Spark-OES  | 10.2  | 5.3   | 1.4   | 5.7   | 1.1   | 1.8   | 20             | 8.7   | 4.6   | 11.3  |
| $R^2$ | LS-ICP-OES | 0.996 | 0.98  | 0.997 | 0.996 | 0.996 | 0.999 | - <sup>b</sup> | 0.991 | 0.995 | 0.999 |
|       | Spark-OES  | 0.999 | 0.999 | 0.989 | 0.993 | 0.999 | 0.999 | 0.873          | 0.999 | 0.999 | 0.997 |

<sup>a</sup> for details see text; <sup>b</sup> data unsuitable for calibration

**Table SI-6** Results from F-tests of PVC<sup>a</sup> values from LS-ICP-MS and GD-MS measurements of pressed doped copper powder and copper samples

| Pressed doped copper powder samples |                       |             |            |                    |                                  | Compact copper samples         |                       |                           |            |                    |                                  |
|-------------------------------------|-----------------------|-------------|------------|--------------------|----------------------------------|--------------------------------|-----------------------|---------------------------|------------|--------------------|----------------------------------|
| Isotope                             | PVC <sup>a</sup> (LS) | PVC (GD-MS) | Test value | Threshold (F-test) | TV <sup>c</sup> below threshold? | Isotope                        | PVC <sup>a</sup> (LS) | PVC (GD-MS <sup>d</sup> ) | Test value | Threshold (F-test) | TV <sup>c</sup> below threshold? |
| <sup>107</sup> Ag                   | 10.93                 | 4.53        | 5.26       | 10.97              | Yes                              | <sup>107</sup> Ag              | 11.35                 | 2.39                      | 22.51      | 29.46              | Yes                              |
| <sup>27</sup> Al                    | 65.12                 | 13.17       | 24.43      | 10.97              | No                               | <sup>75</sup> As               | 12.75                 | 6.14                      | 4.31       | 15.98              | Yes                              |
| <sup>75</sup> As                    | 5.11                  | 3.26        | 2.45       | 8.47               | Yes                              | <sup>209</sup> Bi              | 7.31                  | 3.54                      | 4.27       | 15.98              | Yes                              |
| <sup>209</sup> Bi                   | 1.58                  | 2.61        | 2.73       | 8.47               | Yes                              | <sup>111</sup> Cd              | 4.09                  | 3.21                      | 1.62       | 15.98              | Yes                              |
| <sup>111</sup> Cd <sup>b</sup>      | 2.99                  | 4.97        | 0.36       | 8.47               | Yes                              | <sup>59</sup> Co               | 6.21                  | 3.75                      | 2.74       | 29.46              | Yes                              |
| <sup>59</sup> Co                    | 1.67                  | 2.06        | 0.66       | 8.47               | Yes                              | <sup>53</sup> Cr <sup>b</sup>  | 5.88                  | 6.12                      | 1.08       | 15.98              | Yes                              |
| <sup>53</sup> Cr <sup>c</sup>       | 6.9                   | 4.37        | 2.49       | 8.47               | Yes                              | <sup>55</sup> Mn               | 19.3                  | 5.27                      | 13.39      | 15.98              | Yes                              |
| <sup>165</sup> Ho                   | 1.37                  | 0.92        | 2.2        | 10.97              | Yes                              | <sup>60</sup> Ni               | 15.71                 | 2.27                      | 48.02      | 15.98              | No                               |
| <sup>55</sup> Mn                    | 3.32                  | 4.68        | 1.99       | 8.47               | Yes                              | <sup>208</sup> Pb              | 9.69                  | 4.04                      | 5.73       | 15.98              | Yes                              |
| <sup>60</sup> Ni                    | 9.78                  | 3.38        | 8.38       | 8.47               | Yes                              | <sup>121</sup> Sb              | 7.69                  | 4.55                      | 2.85       | 15.98              | Yes                              |
| <sup>208</sup> Pb                   | 8.12                  | 5.42        | 2.24       | 8.47               | Yes                              | <sup>128</sup> Te <sup>c</sup> | 7.91                  | 3.93                      | 4.05       | 15.98              | Yes                              |
| <sup>45</sup> Sc                    | 0.65                  | 8.57        | 173.2      | 8.47               | No                               |                                |                       |                           |            |                    |                                  |
| <sup>128</sup> Te <sup>d</sup>      | 4.49                  | 37.6        | 70.1       | 8.47               | No                               |                                |                       |                           |            |                    |                                  |
| <sup>169</sup> Tm                   | 2.44                  | 0.99        | 6.16       | 10.97              | Yes                              |                                |                       |                           |            |                    |                                  |

<sup>a</sup> process variation coefficients; <sup>b</sup> <sup>114</sup>Cd in case of GD-MS; <sup>c</sup> Test value (TV); <sup>d</sup> medium resolution in case of GD-MS

**Table SI-7** Results from F-tests of PVC<sup>a</sup> values from LS-ICP-MS and spark-OES measurements of magnesium alloy samples

| Analyte | PVC <sup>a</sup> (LS) | PVC (spark) | Test value (TV) | Threshold (F-test) | TV <sup>b</sup> below threshold? |
|---------|-----------------------|-------------|-----------------|--------------------|----------------------------------|
| Al      | 8.61                  | 3.3         | 6.82            | 6.03               | No                               |
| Ca      | 9.35                  | 3.23        | 8.35            | 10.97              | Yes                              |
| Cu      | 7.99                  | 7.22        | 1.22            | 8.47               | Yes                              |
| Mn      | 2.31                  | 3.85        | 3.85            | 4.85               | Yes                              |
| Si      | 16.99                 | 6.38        | 7.08            | 8.47               | Yes                              |
| Zn      | 4.48                  | 3.23        | 1.92            | 6.99               | Yes                              |

<sup>a</sup> process variation coefficients (PVC); <sup>b</sup> Test Value (TV)
